# Supplementary material for: Novel Associations between Common Breast Cancer Susceptibility Variants and Risk-Predicting Mammographic Density Measures
Source: Oxford University Press journal article supplement (doi:10.1158/0008-5472.can-14-2012), 2015-04-10
Supplement: 00085472can142012-sup-134082_2_supp_2890260_nkt4w3.docx [file 00085472can142012-sup-134082_2_supp_2890260_nkt4w3.docx]

**Supplementary Table 3.** Associations (95% Confidence Interval (CI) in brackets) between breast cancer susceptibility variants and the mammographic measures with adjustment for case-control status

|  |  | **Percent Dense Area** | | | **Dense Area** | | | **Non-dense** | | |
| --- | --- | --- | --- | --- | --- | --- | --- | --- | --- | --- |
| **Variant** | **Locus** | **Beta**  **(95% CI)**a | **Beta**  **(95% CI)**a  **+case adj** | **Proportion SNP Effect**  **Mediated**  **(95% CI)** | **Dense Area Beta**  **(95% CI)**a | **Beta**  **(95% CI)**a  **+case adj** | **Proportion SNP Effect Mediated**  **(95% CI)** | **Beta**  **(95% CI)**a | **Beta**  **(95% CI)**a  **+case adj** | **Proportion SNP Effect**  **Mediated**  **(95% CI)** |
| rs10995190 | *ZNF365* | -0.16  (-0.21, -0.11) | -0.14  (-0.2, -0.09) | 6.0%  (0.5, 11.5) | -0.25  (-0.33, -0.18) | -0.23  (-0.31, -0.16) | 4.2%  (0.4, 7.9) | 0.01  (-0.08, 0.09) | -0.01  (-0.09, 0.07) | --b |
| rs2046210 | *ESR1* | 0.10  (0.06, 0.14) | 0.09  (0.05, 0.13) | 18.6%  (9.6, 27.6) | 0.14  (0.08, 0.19) | 0.13  (0.07, 0.18) | 15.1%  (7.6, 22.5) | -0.02  (-0.08, 0.04) | -0.01  (-0.07, 0.05) | 63.0%  (-76.5,202.5) |
| rs1432679 | *EBF1* | 0.09  (0.05, 0.13) | 0.08  (0.04, 0.12) | 17.1%  (8.5, 25.7) | 0.09  (0.04, 0.15) | 0.09  (0.03, 0.14) | 17.9%  (7.2, 28.7) | -0.11  (-0.16, -0.05) | -0.10  (-0.16, -0.04) | 13.2%  (5.1, 21.3) |
| rs3817198 | *LSP1* | 0.09  (0.05, 0.13) | 0.08  (0.04, 0.12) | 17.2%  (7.3, 27.0) | 0.16  (0.10, 0.21) | 0.15  (0.09, 0.21) | 11.0%  (5.2, 16.7) | -0.001  (-0.07, 0.06) | 0.004  (-0.06, 0.07) | 179%  (-1200,1558) |
| rs17817449 | *MIR1972-2-FTO* | -0.07  (-0.11, -0.03) | -0.07  (-0.11, -0.03) | --b | -0.09  (-0.14, -0.03) | -0.09  (-0.14, -0.03) | --b | 0.06  (-0.00, 0.12) | 0.05  (-0.01, 0.11) | --b |
| rs12710696 | *2p24.1* | -0.07  (-0.11, -0.03) | -0.08  (-0.12, -0.04) | --b | -0.10  (-0.15, -0.04) | -0.11  (-0.16, -0.05) | --b | 0.03  (-0.03, 0.09) | 0.04  (-0.02, 0.10) | --b |
| rs6001930 | *MKL1* | -0.06  (-0.13, -0.00) | -0.08  (-0.14, -0.02) | --b | -0.18  (-0.27, -0.10) | -0.20  (-0.29, -0.12) | --b | -0.23  (-0.33, -0.14) | -0.22  (-0.31, -0.12) | 9.4%  (4.1, 14.6) |
| rs3757318 | *ESR1* | 0.07  (-0.00, 0.15) | 0.05  (-0.03, 0.13) | 44.5%  (-3.6, 92.6) | 0.19  (0.08, 0.30) | 0.16  (0.06, 0.27) | 20.7%  (6.8, 34.7) | 0.12  (0.00, 0.23) | 0.14  (0.02, 0.25) | --b |
| rs17356907 | *NTN4* | -0.03  (-0.07, 0.01) | -0.02  (-0.06, 0.02) | 8.0%  (-16.8, 32.7) | 0.01  (-0.05, 0.07) | 0.03  (-0.03, 0.08) | --b | 0.12  (0.06, 0.18) | 0.11  (0.05, 0.17) | 1.7%  (-3.1, 6.5) |

aOrdinal per allele estimate, Age, 1/BMI, study adjusted

bno evidence that effect is mediated by case-control status
